# Supplementary material for: Development of risk prediction models for glioma based on genome-wide association study findings and comprehensive evaluation of predictive performances
Source: PubMed Central journal article supplement (PMC5823595; doi:10.18632/oncotarget.10882), 2016-07-28
Supplement: oncotarget-09-8311-s001.pdf [file oncotarget-09-8311-s001.pdf]

# Development of risk prediction models for glioma based on genome-wide association study findings and comprehensive evaluation of predictive performances

## SUPPLEMENTARY DATA

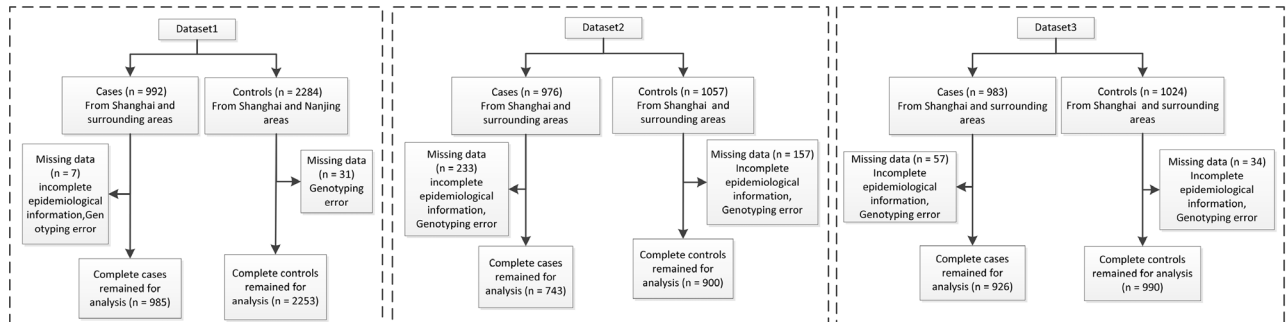

Supplementary Figure 1: Participant flow diagrams of the three datasets in this study.

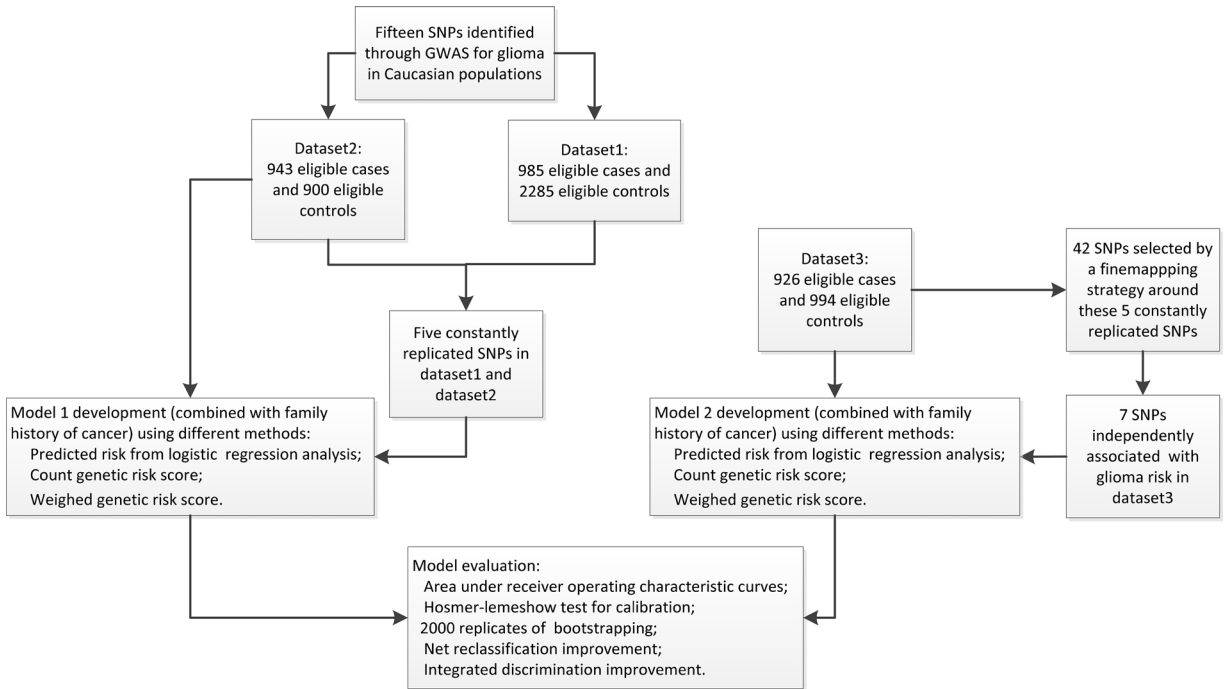

Supplementary Figure 2: Flow chart of the study design.

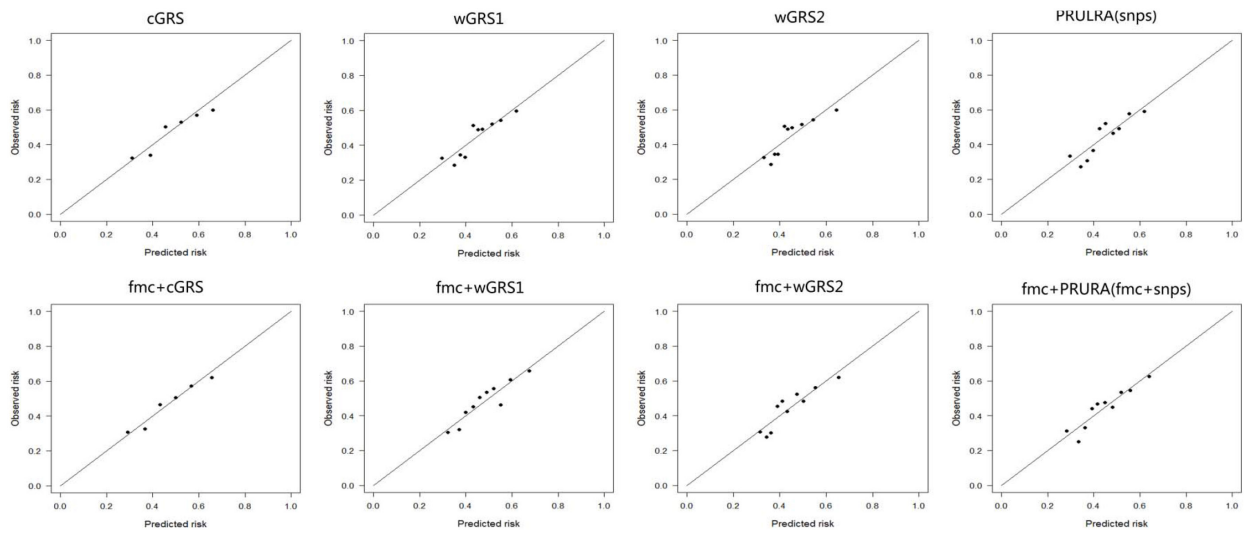

**Supplementary Figure 3: Calibration plots in dataset2.**

fmc: family history of cancer; cGRS: count genetic risk score; wGRS: weighed genetic risk score; PRFLR: predicted risks from logistic regression analysis.

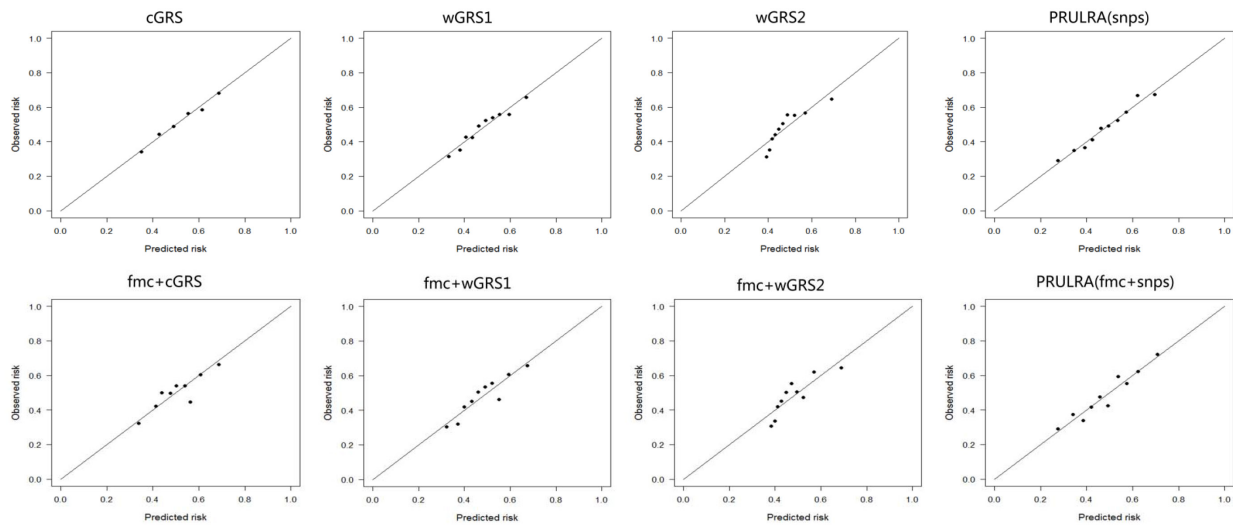

**Supplementary Figure 4: Calibration plots in dataset3.**

fmc: family history of cancer; cGRS: count genetic risk score; wGRS: weighed genetic risk score; PRFLR: predicted risks from logistic regression analysis.

**Supplementary Table 1: Basic epidemiological information of the study subjects**

See Supplementary File : 1

Supplementary Table 2: Univariate logistic regression analysis of family history of cancer with glioma risk

| Epidemiological variable | Dataset2        |          | Dataset3        |          |
|--------------------------|-----------------|----------|-----------------|----------|
|                          | OR (95%CI)      | <i>P</i> | OR (95%CI)      | <i>P</i> |
| Family history of cancer | 1.63(1.24-2.15) | 0.001    | 1.47(1.13-1.91) | 0.004    |

**Supplementary Table 3: Associations between SNPs selected from previous GWAS and glioma risk in datasets 1 and**

See Supplementary File: 1

**Supplementary Table 4: Associations between selected SNPs and glioma risk in dataset3**

See Supplementary File: 1

**Supplementary Table 5: Interaction test P values for all combinations of 5 SNPs used for model development in dataset2**

| SNP1      | SNP2      | Interaction P |
|-----------|-----------|---------------|
| rs2736100 | rs2736100 | 0.326         |
| rs2736100 | rs2157719 | 0.536         |
| rs2736100 | rs498872  | 0.782         |
| rs2736100 | rs6010620 | 0.546         |
| rs1077236 | rs2157719 | 0.769         |
| rs1077236 | rs498872  | 0.831         |
| rs1077236 | rs6010620 | 0.237         |
| rs2157719 | rs498872  | 0.386         |
| rs2157719 | rs6010620 | 0.499         |
| rs498872  | rs6010620 | 0.228         |



**Supplementary Table 6: Interaction test P values for all combinations of 7 SNPs used for model development in dataset3**

| SNP1      | SNP2      | Interaction P |
|-----------|-----------|---------------|
| rs2853677 | rs2735948 | 0.531         |
| rs2853677 | rs6589664 | 0.427         |
| rs2853677 | rs494560  | 0.785         |
| rs2853677 | rs17748   | 0.342         |
| rs2853677 | rs3761121 | 0.196         |
| rs2853677 | rs1058319 | 0.261         |
| rs2735948 | rs6589664 | 0.125         |
| rs2735948 | rs494560  | 0.715         |
| rs2735948 | rs17748   | 0.700         |
| rs2735948 | rs3761121 | 0.031         |
| rs2735948 | rs1058319 | 0.199         |
| rs6589664 | rs494560  | 0.746         |
| rs6589664 | rs17748   | 0.333         |
| rs6589664 | rs3761121 | 0.436         |
| rs6589664 | rs1058319 | 0.055         |
| rs494560  | rs17748   | 0.351         |
| rs494560  | rs3761121 | 0.311         |
| rs494560  | rs1058319 | 0.380         |
| rs17748   | rs3761121 | 0.963         |
| rs17748   | rs1058319 | 0.949         |
| rs3761121 | rs1058319 | 0.059         |
